# Supplementary material for: Sex- and Subtype-Specific Analysis of H2AFX Polymorphisms in Non-Hodgkin Lymphoma
Source: PLoS One. 2013 Sep 17;8(9):e74619. doi: 10.1371/journal.pone.0074619 (PMC3775730; doi:10.1371/journal.pone.0074619)
Supplement: Table S2 — Characteristics of study populations included in meta-analysis. (XLSX) [file pone.0074619.s002.xlsx]

## Sheet: Table S2
Table S2. Characteristics of study populations included in meta-analysis
Study	Population	Controls	DLBCL	FL	All B cell	Genotyping method	Criteria used to define Caucasian race	Variables included in regression
SCALE	Denmark/Sweden	1871	624	413	2183	Sequenom	both parents born in Europe	sex, age (in 5 year intervals), site (Denmark, Sweden), DNA source (amplified or genomic),
SF	San Francisco Bay Area, USA	737	251	209	664	Imputation	white, non-Hispanics by self-report, confirmed by genotype data	sex, age (in 5 year intervals)
BC	Vancouver/Victoria, British Columbia, Canada	468	132	133	444	Illumina Golden Gate Assay	all 4 grandparents of European ancestry, confirmed by genotype data	sex, age (in 5 year intervals), site (Vancouver, Victoria)
NCI-SEER	Detroit/Iowa/Los Angeles/Seattle, USA	378	124	120	373	Fluidigm	White, non-Hispanic by self report	sex, age (in 5 year intervals), site (Detroit, Iowa, Los Angeles, Seattle)
NSW	New South Wales/Australian Capital Territory, Australia	264	76	84	218	Fluidigm	White, non-Hispanic by self report	sex, age (<50, 50-59, 60-69, 70+), site (New South Wales, Australian Capital Territory)
Abbreviations: DLBCL, diffuse large B-cell lymphoma; FL, follicular lymphoma; SCALE, Scandinavian Lymphoma Etiology; SF, San Francisco; NCI-SEER, National Cancer Institute - Surveillance, Epidemiology and End Results; NSW, New South Wales
